# Supplementary material
Source: publisher site journal article supplement (https://natureconservation.pensoft.net/article/24856/download/suppl/34/)
Supplement: Supplementary file 1

**Supplementary Table 4.** The abundance of isopod (Isopoda) and millipede (Diplopoda) species found in set-aside (Sa1–Sa7) – cereal field pairs (CSa1–CSa7). NA indicates the destroyed pitfall traps.

|  |  | **Sa1** | | | | **Sa2** | | | | **Sa3** | | | | **Sa4** | | | | **Sa5** | | | | **Sa6** | | | | **Sa7** | | | |
| --- | --- | --- | --- | --- | --- | --- | --- | --- | --- | --- | --- | --- | --- | --- | --- | --- | --- | --- | --- | --- | --- | --- | --- | --- | --- | --- | --- | --- | --- |
|  |  | **0** | **5** | **10** | **20** | **0** | **5** | **10** | **20** | **0** | **5** | **10** | **20** | **0** | **5** | **10** | **20** | **0** | **5** | **10** | **20** | **0** | **5** | **10** | **20** | **0** | **5** | **10** | **20** |
| **Isopoda** | *Armadillidium vulgare* | 0 | 0 | 0 | 0 | 0 | 0 | 0 | 0 | 0 | 0 | 0 | 0 | 0 | 0 | 0 | 0 | 2 | 0 | 0 | 0 | 8 | 5 | 19 | 7 | 5 | 23 | 4 | 0 |
| *Trachelipus rathkii* | 0 | 0 | 1 | 0 | 4 | 0 | 1 | 2 | 4 | 0 | 2 | 0 | 0 | 0 | 0 | 0 | 1 | 0 | 0 | 4 | 0 | 0 | 0 | 0 | 0 | 1 | 0 | 0 |
| *Trachelipus nodulosus* | 0 | 0 | 0 | 0 | 0 | 0 | 0 | 0 | 0 | 0 | 0 | 0 | 0 | 0 | 0 | 0 | 0 | 0 | 0 | 0 | 1 | 0 | 2 | 2 | 0 | 0 | 0 | 0 |
| *Porcellionides pruinosus* | 0 | 0 | 0 | 0 | 0 | 0 | 0 | 0 | 0 | 0 | 0 | 0 | 0 | 0 | 0 | 0 | 0 | 0 | 0 | 0 | 0 | 0 | 0 | 0 | 0 | 0 | 0 | 0 |
| **Diplopoda** | *Brachydesmus superus* | 0 | 0 | 0 | 0 | 0 | 0 | 0 | 0 | 0 | 0 | 0 | 0 | 0 | 0 | 0 | 0 | 0 | 0 | 0 | 0 | 0 | 0 | 0 | 0 | 0 | 0 | 0 | 0 |
| *Brachyiulus bagnalli* | 0 | 0 | 0 | 0 | 0 | 0 | 0 | 1 | 0 | 0 | 0 | 0 | 0 | 0 | 0 | 0 | 1 | 0 | 0 | 0 | 1 | 0 | 0 | 0 | 0 | 0 | 0 | 0 |
| *Julus terrestris* | 0 | 0 | 0 | 0 | 2 | 1 | 1 | 0 | 0 | 0 | 1 | 0 | 0 | 0 | 0 | 0 | 1 | 0 | 0 | 3 | 0 | 0 | 0 | 0 | 0 | 0 | 0 | 0 |
| *Megaphyllum unilineatum* | 0 | 0 | 0 | 0 | 0 | 0 | 0 | 0 | 1 | 2 | 0 | 1 | 0 | 0 | 0 | 0 | 0 | 0 | 0 | 1 | 3 | 4 | 0 | 2 | 2 | 4 | 4 | 1 |
|  |  |  |  |  |  |  |  |  |  |  |  |  |  |  |  |  |  |  |  |  |  |  |  |  |  |  |  |  |  |
|  |  | **CSa1** | | | | **CSa2** | | | | **CSa3** | | | | **CSa4** | | | | **CSa5** | | | | **CSa6** | | | | **CSa7** | | | |
|  |  | **0** | **5** | **10** | **20** | **0** | **5** | **10** | **20** | **0** | **5** | **10** | **20** | **0** | **5** | **10** | **20** | **0** | **5** | **10** | **20** | **0** | **5** | **10** | **20** | **0** | **5** | **10** | **20** |
| **Isopoda** | *Armadillidium vulgare* | 1 | 0 | 0 | 3 | 0 | 0 | 0 | 0 | 0 | 0 | 0 | 0 | 0 | 0 | 0 | 0 | 0 | 0 | 0 | 0 | NA | 0 | 5 | NA | 1 | 4 | 7 | NA |
| *Trachelipus rathkii* | 0 | 0 | 1 | 3 | 0 | 0 | 0 | 0 | 0 | 0 | 0 | 0 | 0 | 0 | 0 | 0 | 0 | 0 | 0 | 0 | NA | 2 | 0 | NA | 0 | 0 | 0 | NA |
| *Trachelipus nodulosus* | 0 | 0 | 0 | 0 | 0 | 0 | 0 | 0 | 0 | 0 | 0 | 0 | 0 | 0 | 0 | 0 | 0 | 0 | 0 | 0 | NA | 0 | 1 | NA | 0 | 0 | 0 | NA |
| *Porcellionides pruinosus* | 0 | 0 | 0 | 0 | 0 | 0 | 0 | 0 | 0 | 8 | 0 | 0 | 0 | 0 | 0 | 0 | 0 | 0 | 0 | 0 | NA | 0 | 0 | NA | 0 | 0 | 0 | NA |
| **Diplopoda** | *Brachydesmus superus* | 0 | 0 | 0 | 0 | 0 | 0 | 0 | 0 | 0 | 0 | 0 | 0 | 0 | 0 | 0 | 0 | 0 | 0 | 0 | 0 | NA | 0 | 0 | NA | 0 | 0 | 0 | NA |
| *Brachyiulus bagnalli* | 1 | 3 | 0 | 0 | 0 | 0 | 0 | 1 | 0 | 0 | 0 | 0 | 0 | 0 | 0 | 0 | 0 | 0 | 0 | 0 | NA | 0 | 1 | NA | 0 | 4 | 1 | NA |
| *Julus terrestris* | 0 | 0 | 0 | 0 | 1 | 1 | 3 | 2 | 0 | 0 | 0 | 0 | 0 | 0 | 0 | 1 | 0 | 0 | 3 | 0 | NA | 0 | 0 | NA | 0 | 0 | 0 | NA |
| *Megaphyllum unilineatum* | 0 | 0 | 0 | 0 | 0 | 0 | 0 | 0 | 0 | 1 | 0 | 0 | 0 | 0 | 0 | 0 | 0 | 0 | 0 | 0 | NA | 1 | 0 | NA | 2 | 2 | 2 | NA |
